# Supplementary material for: Global development and diffusion of outcome evaluation research for interpersonal and self-directed violence prevention from 2007 to 2013: A systematic review
Source: PubMed Central journal article supplement — Aggress Violent Behav. Author manuscript; Available in PMC 2018 May 1. (PMC5929156; doi:10.1016/j.avb.2014.09.006), 2014-10-05
Supplement: NIHMS953141-supplement-Supplementa.pdf [file NIHMS953141-supplement-Supplementa.pdf]

**Supplementary Table 1: Evaluation studies undertaken in low- and middle-income countries**

| Ref | Country of:<br>Intervention<br>Collaborators <sup>a</sup><br>Funding | Year | Violence type                  | Study type<br><i>Follow up<br/>period</i>                      | Intervention type<br><i>Brief description</i>                                                                                                                                                                             | Setting                                                                               | Sample<br>(sample size)<br>Age                                                                                                                      | Highly<br>rated | Reported findings                                                                                                   |
|-----|----------------------------------------------------------------------|------|--------------------------------|----------------------------------------------------------------|---------------------------------------------------------------------------------------------------------------------------------------------------------------------------------------------------------------------------|---------------------------------------------------------------------------------------|-----------------------------------------------------------------------------------------------------------------------------------------------------|-----------------|---------------------------------------------------------------------------------------------------------------------|
| 1   | <b>Brazil</b><br>None<br><i>Brazil</i>                               | 2010 | Youth<br>violence              | ITS<br><i>2000 to<br/>2006,<br/>Intervention<br/>2002</i>      | <b>Multi-component program</b><br>Staying Alive program<br><i>Including awareness-raising, increased<br/>policing and enforcement, community<br/>problem solving and provision of youth<br/>recreation opportunities.</i> | Community<br><i>One city</i>                                                          | Total population                                                                                                                                    | No              | The program was associated with sustained, but varying, reductions in homicides.                                    |
| 2   | <b>Brazil</b><br>USA<br><i>Brazil</i>                                | 2007 | Other<br>(Firearm)             | ITS<br><i>1996 to<br/>2005,<br/>Intervention<br/>2003</i>      | <b>Legislative change</b><br><i>Introduction of strengthened legislation<br/>controlling access, ownership and<br/>carrying of firearms.</i>                                                                              | Community<br><i>National</i>                                                          | Total population                                                                                                                                    | No              | Firearms mortality and firearm-related hospitalizations reduced following legislative reforms.                      |
| 3   | <b>Brazil</b><br>USA, UK<br><i>Brazil, USA</i>                       | 2007 | Other<br>(Alcohol-<br>related) | ITS<br><i>1995 to<br/>2005,<br/>Intervention<br/>year 2002</i> | <b>Legislative change</b><br><i>Introduction of a law which required all<br/>bars to close by 11pm (most were open<br/>24 hours before the law).</i>                                                                      | Community<br><i>One city</i>                                                          | Total population                                                                                                                                    | No              | Homicides reduced following the introduction of the law. Reductions in assaults against women were not significant. |
| 4   | <b>Burundi</b><br>Netherlands,<br>UK, USA<br><i>Netherlands</i>      | 2013 | Youth<br>violence              | CA<br><i>3 weeks</i>                                           | <b>Parenting program</b><br><i>2 group sessions focusing on youth<br/>psychosocial problems, communication<br/>and behavior management strategies</i>                                                                     | Educational<br><i>1 case and<br/>one control<br/>school</i>                           | Parents of children<br>with psychosocial<br>distress (n=120)<br><i>Children mean age<br/>12.3 (range 10-14)<br/>Parents mean age<br/>41.3 years</i> | No              | Reduced aggression in boys but not girls. No impact on depressive symptoms or perceived social support              |
| 5   | <b>China</b><br>None<br><i>China</i>                                 | 2009 | Youth<br>violence              | RCT<br><i>Immediate</i>                                        | <b>Skills-based program</b><br><i>Weekly 1 hour sessions for 12 weeks<br/>focusing on social skills training.</i>                                                                                                         | Health/<br>Educational <sup>b</sup><br><i>Psychiatric<br/>outpatient<br/>clinics/</i> | Children with<br>behavior disorders<br>(n=441)<br><i>Age 7-13 years</i>                                                                             | No              | Anti-social behavior, delinquency and aggression scores showed improvements post intervention compared              |

|    |                                                          |      |                            |                                               |                                                                                                                                                                                                                                          |                                             |                                                                                            |     |                                                                                                                                                 |
|----|----------------------------------------------------------|------|----------------------------|-----------------------------------------------|------------------------------------------------------------------------------------------------------------------------------------------------------------------------------------------------------------------------------------------|---------------------------------------------|--------------------------------------------------------------------------------------------|-----|-------------------------------------------------------------------------------------------------------------------------------------------------|
|    |                                                          |      |                            |                                               |                                                                                                                                                                                                                                          | <i>primary schools in six urban areas</i>   |                                                                                            |     | with a waitlist control group.                                                                                                                  |
| 6  | <b>Taiwan, China</b><br>USA<br><i>Taiwan, China (Tw)</i> | 2012 | Child maltreatment         | CCT<br><i>1-2 weeks</i>                       | <b>Skills-based program</b><br><i>Two 50 minute sessions covering sexual abuse knowledge and prevention and abduction prevention.</i>                                                                                                    | Educational<br><i>One elementary school</i> | School children (n=46)<br><i>Age 6-13 years</i>                                            | No  | The program improved children's self-protection skills but not their knowledge of sexuality and safety.                                         |
| 7  | <b>Taiwan, China</b><br>None<br><i>Taiwan, China</i>     | 2009 | Other (Elder maltreatment) | CC<br><i>1 week</i>                           | <b>Support group</b><br><i>Educational support group intervention covering issues such as ageing, managing residents' health problems, elder abuse and stress management.</i>                                                            | Health/clinical<br><i>4 nursing homes</i>   | Caregivers in nursing homes (n=100)<br><i>Mean age 42.9 years Range 21-60 years</i>        | No  | The intervention was associated with increased caregiver knowledge and alleviated psychological abuse behavior.                                 |
| 8  | <b>Taiwan, China</b><br>None<br><i>NR</i>                | 2009 | Self-directed violence     | CCT<br><i>Immediate</i>                       | <b>Therapy/counseling</b><br><i>Intensive interpersonal psychotherapy sessions (2 per week for 6 weeks) for high risk depressed adolescents.</i>                                                                                         | Educational<br><i>1 high school</i>         | Depressed students (n=73)<br><i>Mean age 15.2 Range 12-18</i>                              | No  | Students participating in psychotherapy had lower post-intervention suicide ideation and depression severity than the treatment as usual group. |
| 9  | <b>Taiwan, China</b><br>None<br><i>NR</i>                | 2011 | Self-directed violence     | ITS<br><i>2005 to 2008, Intervention 2006</i> | <b>Multi-component program</b><br><i>Establishment of a suicide prevention center providing, e.g., a website, training for community gatekeepers, 24 hour crisis line, referral to medical resources and enhanced reporting systems.</i> | Community<br><i>One city</i>                | Total population                                                                           | No  | During the time the intervention was in place, the suicide rate decreased as did the suicide re-attempt rate for those receiving services.      |
| 10 | <b>Colombia</b><br>USA<br><i>Colombia</i>                | 2009 | Youth violence             | RCT<br><i>~4 months</i>                       | <b>Behavior management</b><br><i>10 weekly sessions of either teacher training or combined teacher training/parenting intervention.</i>                                                                                                  | Educational<br><i>12 public schools</i>     | 1 <sup>st</sup> & 2 <sup>nd</sup> grade students (n=2,491),<br><i>Mean age 7.2 years</i>   | Yes | Aggression remained constant in both intervention groups compared with increases in a control group.                                            |
| 11 | <b>India</b> <sup>b</sup><br>None<br><i>NR</i>           | 2008 | Youth violence             | CCT<br><i>NR</i>                              | <b>Skills-based program</b><br><i>Twice weekly sessions for one year of either a) yoga-cognitive training or b) human relationship training, both with parental management training.</i>                                                 | NR <sup>c</sup>                             | Deviant adolescent boys (n=120)<br><i>studying in 10<sup>th</sup> standard<sup>c</sup></i> | No  | Both groups showed improvements in maladjustment and antisocial behaviors compared to a control                                                 |

|    |                                                                                |      |                                            |                                                            |                                                                                                                                                                                                                            |                                             |                                                                                |     |                                                                                                                                       |
|----|--------------------------------------------------------------------------------|------|--------------------------------------------|------------------------------------------------------------|----------------------------------------------------------------------------------------------------------------------------------------------------------------------------------------------------------------------------|---------------------------------------------|--------------------------------------------------------------------------------|-----|---------------------------------------------------------------------------------------------------------------------------------------|
|    |                                                                                |      |                                            |                                                            |                                                                                                                                                                                                                            |                                             |                                                                                |     | group.                                                                                                                                |
| 12 | <b>India</b><br>UK<br><i>International (Bill and Melinda Gates Foundation)</i> | 2010 | Sexual violence                            | CS<br>33-37 months                                         | <b>Multi-component program</b><br><i>Policy-level committees, police officer training, and mobilization of sex worker communities, including drop in centers, training programs, legal advocacy and crisis management.</i> | Community<br>4 districts in Karnataka state | Female sex workers (n=7,638), Mean age 31.7 years (n=3,852), Age not collected | No  | Reductions seen in the proportions of sex workers reporting violence following the intervention.                                      |
| 13 | <b>Iran</b><br>Australia<br>NR                                                 | 2010 | Child maltreatment                         | RCT<br>8 weeks                                             | <b>Parenting program</b><br><i>Two 2 hour sessions teaching parenting skills</i>                                                                                                                                           | Health<br>5 health centers                  | Mothers of children aged 2-6 years (n=224)<br>Mean age 29.5 years              | Yes | Participating mothers had improved scores on parenting behavior scales following intervention.                                        |
| 14 | <b>Iran</b><br>None<br>NR                                                      | 2009 | Other (Violence towards health care staff) | CA<br>Immediate                                            | <b>Behavior management</b><br><i>Training program comprising 4 weekly sessions to teach ED staff to manage patient anger</i>                                                                                               | Health<br>Single ED department              | ED nurses (n=66)<br>Mean age 33 years<br>Range 20-50 years                     | No  | Fewer nurses reported psychological violence post intervention; no changes in physical violence.                                      |
| 15 | <b>Jamaica</b><br>UK<br><i>International (Wellcome Trust)</i>                  | 2012 | Youth violence                             | RCT<br>1-2 months                                          | <b>Behavior management</b><br>Incredible Years<br><i>8 day teacher training program focusing on classroom behavior management and social skills promotion.</i>                                                             | Educational<br>24 community preschools      | Children with conduct problems (n=225)<br>Age 3-6 years                        | Yes | Children in intervention schools had reduced conduct problems and behavior difficulties compared with controls.                       |
| 16 | <b>Jamaica</b><br>UK<br><i>International (World Bank)</i>                      | 2011 | Youth Violence                             | CCT<br>Age 22 years                                        | <b>Home visiting</b><br><i>Weekly home visits over 2 years by community health workers offering either nutritional supplementation or psychosocial stimulation to improve mother-child interaction</i>                     | Home                                        | Growth-retarded children (n=129)<br>Age 9-24 months                            | Yes | Psychosocial stimulation associated with reduced involvement in fights and serious violence. Nutritional supplements had no benefits. |
| 17 | <b>Kenya</b><br>USA<br>NR                                                      | 2013 | Sexual violence                            | CCT<br>10 months<br>(appears to be at refresher session??) | <b>Skills-based program</b><br>No Means No Worldwide<br><i>6 weekly sessions focused on self-defence skills and empowerment to prevent sexual assault</i>                                                                  | Educational<br>10 high schools              | Female students (n=522)<br>Mean age 16.7 years (range 14-21)                   | No  | Incidence of sexual assault reported to have reduced compared with a control group.                                                   |
| 18 | <b>Malaysia</b><br>None                                                        | 2012 | Child maltreatment                         | CA<br>2 months                                             | <b>Skills-based program</b><br>Keeping Me Safe                                                                                                                                                                             | Educational<br>5 primary                    | School children (n=445)                                                        | No  | Participating students showed gains in                                                                                                |

|    |                                      |      |                           |                                                |                                                                                                                                                                                                                                                         |                                                             |                                                                                      |     |                                                                                                                                                                                         |
|----|--------------------------------------|------|---------------------------|------------------------------------------------|---------------------------------------------------------------------------------------------------------------------------------------------------------------------------------------------------------------------------------------------------------|-------------------------------------------------------------|--------------------------------------------------------------------------------------|-----|-----------------------------------------------------------------------------------------------------------------------------------------------------------------------------------------|
|    | Malaysia                             |      |                           |                                                | Six weekly 1hour sessions teaching children about unsafe situations and touches, appropriate safety strategies and asking for help.                                                                                                                     | schools                                                     | Mostly age 9 years                                                                   |     | knowledge and perceived reporting practices compared with control children.                                                                                                             |
| 19 | Mexico<br>USA<br>Mexico, USA         | 2009 | Youth violence            | CC<br>3.5-5 years                              | <b>Conditional cash transfers</b><br>Oportunidades<br>Cash transfers for poor rural families on condition of, e.g., child health service use, nutritional supplementation and school enrolment.                                                         | Community<br>506 poor rural communities,<br>152 comparisons | Children aged 56-68 months (n=1,041)<br>Mean age 62 months                           | Yes | Family participation in the program was associated with lower aggressive and oppositional problems in young children but not with overall problem behaviors.                            |
| 20 | Mongolia<br>USA<br>USA               | 2012 | Intimate partner violence | RCT<br>6 months                                | <b>Skills-based program</b><br>4 weekly sessions, either a) knowledge and skills related to HIV/STI risk reduction; b) the same sessions enhanced with two motivational interviewing sessions; or c) overall health and wellbeing knowledge and skills. | Community                                                   | Female sex workers with harmful alcohol use (n=166)<br>NR                            | No  | Exposure to physical and sexual violence by an intimate or paying partner reduced in all three groups following the intervention.                                                       |
| 21 | Pakistan<br>UK<br>Pakistan           | 2009 | Other (Extremism)         | CCT<br>1-3 days                                | <b>Challenging social norms</b><br>One 1hr 40 minute lecture on the history of Muslim-Jewish relations.                                                                                                                                                 | Educational<br>Single university                            | Under- and post-graduate students (n=92)<br>Mean age 21.5 years<br>Range 21-29 years | No  | Compared with controls, participants showed lower normative beliefs approving aggression against Jewish people and were less likely to show interest in joining a 'Muslim Youth Force'. |
| 22 | Serbia<br>None<br>NR                 | 2007 | Self-directed violence    | ITS<br>1989 to 2005,<br>Intervention year 2003 | <b>Multi-component program</b><br>Suicide prevention program incorporating policies on selection processes, education and motivation.                                                                                                                   | Military<br>National                                        | Military personnel<br>NR                                                             | No  | Number of military suicides decreased following implementation of the program.                                                                                                          |
| 23 | South Africa<br>USA<br>South Africa, | 2008 | Intimate partner violence | RCT<br>2 years                                 | <b>Skills-based program</b><br>Stepping Stones<br>Participatory learning sessions (single-                                                                                                                                                              | Community<br>64 villages and 6                              | Young men and women (n=2,776)<br>Age 15-26 years                                     | No  | Participating men reported reduced perpetration of physical                                                                                                                             |

|    |                                                                                  |      |                           |                         |                                                                                                                                                                                                                                     |                                    |                                                                                                          |    |                                                                                                                                                                                                                                                                    |
|----|----------------------------------------------------------------------------------|------|---------------------------|-------------------------|-------------------------------------------------------------------------------------------------------------------------------------------------------------------------------------------------------------------------------------|------------------------------------|----------------------------------------------------------------------------------------------------------|----|--------------------------------------------------------------------------------------------------------------------------------------------------------------------------------------------------------------------------------------------------------------------|
|    | USA                                                                              |      |                           |                         | <i>sex groups, 50 hours over 6-8 weeks) covering issues including sex and relationships, communication, safer sex and gender based violence.</i>                                                                                    | <i>townships</i>                   |                                                                                                          |    | or sexual intimate partner violence compared with controls. No effects on violence for women.                                                                                                                                                                      |
| 24 | <b>South Africa</b><br>UK<br><i>South Africa, UK, USA, Sweden, International</i> | 2007 | Intimate partner violence | RCT<br><i>2 years</i>   | <b>Multicomponent program</b><br>Microfinance for AIDS and Gender Equity (IMAGE)<br><i>Credit and savings services for poor rural woman combined with training on HIV, gender norms, intimate partner violence and sexuality.</i>   | Community<br><i>8 villages</i>     | Poor rural women (n=860)<br><i>Mean age 42 years Range 18-26 years</i>                                   | No | Risk of past year physical or sexual violence by an intimate partner reduced by more than half.                                                                                                                                                                    |
| 25 | <b>South Africa</b><br>USA<br>USA                                                | 2009 | Sexual violence           | CCT<br><i>6 months</i>  | <b>Skills-based program</b><br><i>Five sessions addressing gender-based violence and HIV risk behaviors, compared with a single alcohol and HIV risk reduction session.</i>                                                         | Community<br><i>2 townships</i>    | Men (n=475)<br><i>Mean age 30.2 years</i>                                                                | No | Men in the violence and HIV intervention reported less violence against a woman post intervention than those in the alcohol and HIV intervention.                                                                                                                  |
| 26 | <b>South Africa</b><br>USA<br>USA                                                | 2011 | Sexual violence           | CCT<br><i>6 months</i>  | <b>Skills-based program</b><br>The Women's Health CoOp<br><i>Two sessions of either a women-focused empowerment program addressing substance use, HIV and gender-based violence, or a standard intervention on the same topics.</i> | Community                          | Female sex workers or females reporting recent unprotected sex (n=583)<br><i>&gt;80% age 18-34 years</i> | No | Women in both interventions reported reductions in victimization. Compared with the standard intervention, the women-focused intervention had greater benefits for sex workers in reducing physical violence, and for non-sex workers in reducing sexual violence. |
| 27 | <b>South Africa</b><br>USA<br>USA                                                | 2013 | Intimate partner violence | RCT<br><i>12 months</i> | <b>Skills-based program</b><br>The Women's Health CoOp<br><i>Two sessions of a women-focused empowerment program addressing substance use, HIV and gender-based</i>                                                                 | Community<br><i>15 communities</i> | Drug-using women (n=720)<br><i>Mean age 23 (range 18-33)</i>                                             | No | There was no impact of the women-focused program on victimization although benefits were seen in increasing drug                                                                                                                                                   |

|    |                                    |      |                           |                        |                                                                                                                                                                                        |                                             |                                                                                         |    |                                                                                                                                                                      |
|----|------------------------------------|------|---------------------------|------------------------|----------------------------------------------------------------------------------------------------------------------------------------------------------------------------------------|---------------------------------------------|-----------------------------------------------------------------------------------------|----|----------------------------------------------------------------------------------------------------------------------------------------------------------------------|
|    |                                    |      |                           |                        | <i>violence, compared with an equal-attention nutrition intervention or HIV counseling and testing.</i>                                                                                |                                             |                                                                                         |    | abstinence.                                                                                                                                                          |
| 28 | <b>South Africa</b><br>USA<br>USA  | 2013 | Intimate partner violence | CCT<br>6-8 weeks       | <b>Skills-based program</b><br>PartnerPlus<br><i>4 weekly sessions focusing on STI/HIV prevention, sexual negotiation and gender issues</i>                                            | Health<br>12 antenatal clinics              | Pregnant women and their partners<br>(n=478, 239 couples)<br><i>Mean age 28.2 years</i> | No | Participants' reports of verbal aggression and violence reduced following the intervention compared to the control group.                                            |
| 29 | <b>Thailand</b><br>USA<br>Thailand | 2012 | Youth violence            | CS<br><i>Immediate</i> | <b>Skills-based program</b><br><i>12 weekly sessions covering, e.g., understanding and managing feelings and emotions, effective communication, coping skill, and problem solving.</i> | Educational<br><i>One high school</i>       | School students with moderate/ high aggression<br>(n=45)<br><i>Age 12-15 years</i>      | No | Students' aggressive attitudes decreased as did observed physical and verbal aggressive behaviors.                                                                   |
| 30 | <b>Thailand</b><br>Australia<br>NR | 2013 | Youth violence            | CCT<br><i>3 months</i> | <b>Skills-based program</b><br><i>Daily sessions over three weeks delivering mindfulness meditation with lectures and discussion on behavioral issues.</i>                             | Educational<br><i>1 technical college</i>   | College students<br>(n=96)<br><i>Mean age 17.6 years</i>                                | No | No impacts of the program were found on anger or violence.                                                                                                           |
| 31 | <b>Turkey</b><br>None<br>NR        | 2010 | Youth violence            | CA<br><i>Immediate</i> | <b>Skills-based program</b><br>I Can Problem Solve<br><i>83 lessons delivered over ~4 months, covering problem solving and cognitive thinking.</i>                                     | Educational                                 | School students<br>(n=83)<br><i>Age 5-6 years</i>                                       | No | The program had no impact on aggression scores but improved pro-social and introvert behaviors compared with a control group.                                        |
| 32 | <b>Turkey</b><br>None<br>NR        | 2007 | Youth violence            | CC<br><i>Immediate</i> | <b>Skills-based program</b><br>We can resolve our conflicts<br><i>Conflict resolution program for school children delivered twice a week for 10 weeks.</i>                             | Educational<br><i>One elementary school</i> | School students<br>(n=166)<br><i>Age 8-12 years</i>                                     | No | Conflict resolution skills increased in participating children compared with controls. Aggression, conduct problems and peer victimization decreased in some grades. |
| 33 | <b>Turkey<sup>d</sup></b>          | 2012 | Youth                     | Other                  | <b>Skills-based program</b>                                                                                                                                                            | Educational                                 | Students with                                                                           | No | Students reached the                                                                                                                                                 |

|            |  |          |                                    |                                                                                   |                       |                                                    |  |                                                                                                                             |
|------------|--|----------|------------------------------------|-----------------------------------------------------------------------------------|-----------------------|----------------------------------------------------|--|-----------------------------------------------------------------------------------------------------------------------------|
| None<br>NR |  | violence | (Multiple-probe design)<br>4 weeks | Four 40 min sessions in a week covering anger management and conflict resolution. | One elementary school | intellectual disabilities (n=9)<br>Age 10-12 years |  | acceptable criterion for presenting anger without harming others and non-violent conflict resolution following the program. |
|------------|--|----------|------------------------------------|-----------------------------------------------------------------------------------|-----------------------|----------------------------------------------------|--|-----------------------------------------------------------------------------------------------------------------------------|

RCT=Randomized Controlled Trial; CCT=Clinical Controlled Trial (includes studies described by authors as RCTs but not providing sufficient information to establish this);

CA=Cohort Analytic; CC=Case Control; CS=Cohort Study; ITS=Interrupted Time Series; Tw = Taiwan; NR = not reported; ED = emergency department.

<sup>a</sup>Collaborators are identified as authors on articles; <sup>b</sup> Study information may be inaccurate due to unclear reporting; <sup>c</sup> Classified as educational for the purpose of analysis due to article describing participants as school boys; no age is reported but 10<sup>th</sup> standard (10<sup>th</sup> grade) students are likely to be in the 15-16 year age range; <sup>d</sup> Based on an English summary of the full Turkish language article.

#### References:

1. Silveira, A.M., Assuncao, R.M., Silva, B.A., & Beato Filho, C.C. (2010). Impact of the Staying Alive Program on the reduction of homicides in a community in Belo Horizonte. *Revista de Saude Publica*, 44(3), 496-502.
2. Marinho de Souza, Mde. F., Macinko, J., Alencar, A.P., Malta D.C., de Moraes Neto O.L. (2007). Reductions in firearm-related mortality and hospitalizations in Brazil after gun control. *Health Affairs*, 26(2), 575-584.
3. Duailibi S., Ponicki W., Grube J., Pinsky I., Laranjeira R., & Raw M. (2007). The effect of restricting opening hours on alcohol-related violence. *American Journal of Public Health*, 97(12), 2276-2280.
4. Jordans M.J., Tol W.A., Ndayisaba A., & Komproe I.H. (2013). A controlled evaluation of a brief parenting psychoeducation intervention in Burundi. *Social Psychiatry and Psychiatric Epidemiology*, 48(11), 1851-1859.
5. Liu C., Wang Y., Wang Y., Xuan X., Xu T., Tang G.Z., et al. (2009) [A multi-center randomized controlled trial of social skills training among children with behavior problems]. *Zhonghua Yi Xue Za Zhi*, 89(35), 2468-2471.
6. Chen, Y.C., Fortson, B.L., & Tseng, K.W. (2012). Pilot evaluation of a sexual abuse prevention program for Taiwanese children. *Journal of Child Sexual Abuse*, 21(6), 621-645.
7. Hsieh H.F., Wang J.J., Yen M., & Liu T.T. (2009). Educational support group in changing caregivers' psychological elder abuse behavior toward caring for institutionalized elders. *Advances in Health Science Education: Theory and Practice*, 14(3), 377-386.
8. Tang T.C., Jou S.H., Ko C.H., Huang S.Y., & Yen C.F. (2009). Randomized study of school-based intensive interpersonal psychotherapy for depressed adolescents with suicidal risk and parasuicide behaviors. *Psychiatry and Clinical Neurosciences*, 63(4), 463-470.
9. Ho W.W., Chen W.J., Ho C.K., Lee M.B., Chen C.C., Chou F.H. (2011). Evaluation of the suicide prevention program in Kaohsiung City, Taiwan, using the CIPP evaluation model. *Community Mental Health Journal*, 47(5), 542-550.
10. Klevens J., Martinez J.W., Le B., Rojas C., Duque A., & Tovar R. (2009). Evaluation of two interventions to reduce aggressive and antisocial behavior in first and second graders in a resource-poor setting. *International Journal of Educational Research*, 48(5), 307-319.

11. Kannappan R., & Lakshmi Bai R. (2008). Efficacy of yoga: cognitive and human relationship training for correcting maladjustment behaviour in deviant school boys. *Journal of the Indian Academy of Applied Psychology*, 34(SI), 60-65.
12. Beattie T.S., Bhattacharjee P., Ramesh B.M., Gurnani V., Anthony J., Isac S., et al. (2010). Violence against female sex workers in Karnataka state, south India: impact on health, and reductions in violence following an intervention program. *BMC Public Health*, 10, 476.
13. Oveisi, S., Ardabili, H.E., Dadds, M.R., Majdzadeh, R., Mohammadkhani, P., Rad, J.A., et al. (2010). Primary prevention of parent-child conflict and abuse in Iranian mothers: a randomized-controlled trial. *Child Abuse & Neglect*, 34(3), 206-213.
14. Eslamian J., Fard S.H., Tavakol K.m & Yazdani M. (2010). The effect of anger management by nursing staff on violence rate against them in the emergency unit. *Iranian Journal of Nursing and Midwifery Research*, 15(S1), 337-342.
15. Baker-Henningham, H., Scott, S., Jones, K., & Walker, S. (2012). Reducing child conduct problems and promoting social skills in a middle-income country: cluster randomised controlled trial. *British Journal of Psychiatry*, 201:101-108, Epub ahead of print.
16. Walker S.P., Chang S.M., Vera-Hernandez M. Grantham-McGregor S. (2011). Early childhood stimulation benefits adult competence and reduces violent behavior. *Pediatrics*, 127(5), 849-857.
17. Sinclair J., Sinclair L., Otieno E., Mulinge M., Kapphahn C., & Golden N.H. (2013). A self-defense program reduces the incidence of sexual assault in Kenyan adolescent girls. *Journal of Adolescent Health*, 53(3), 374-380.
18. Weatherley, R., Hajar, A.B.S., Noralina, O., John, M., Preusser, N., & Yong, M. (2012). Evaluation of a school-based sexual abuse prevention curriculum in Malaysia. *Children and Youth Services Review*, 34(1), 119-125.
19. Ozer E.J., Fernald L.C., Manley J.G., Gertler P.J. (2009). Effects of a conditional cash transfer program on children's behavior problems. *Pediatrics*, 123(4), e630-7.
20. Carlson C.E., Chen J., Chang M., Batsukh A., Toivgoos A., Riedel M., et al. (2012). Reducing intimate and paying partner violence against women who exchange sex in Mongolia: results from a randomized clinical trial. *Journal of Interpersonal Violence*, 27(10), 1911-1931.
21. Amjad N., & Wood A.M. (2009). Identifying and changing the normative beliefs about aggression which lead young Muslim adults to join extremist anti-Semitic groups in Pakistan. *Aggressive Behavior*, 35(6), 514-519.
22. Dedic G., & Panic M. (2007). Suicide prevention program in the Army of Serbia and Montenegro. *Military Medicine*, 172(5), 551-555.
23. Jewkes, R., Nduna, M., Levin, J., Jama, N., Dunkle, K., Puren, A., et al. (2008). Impact of stepping stones on incidence of HIV and HSV-2 and sexual behaviour in rural South Africa: cluster randomised controlled trial. *BMJ*, 337, a506.
24. Kim J.C., Watts C.H., Hargreaves J.R., Ndhlovu L.X., Phetla G., Morison L.A., et al. (2007). Understanding the impact of a microfinance-based intervention on women's empowerment and the reduction of intimate partner violence in South Africa. *American Journal of Public Health*, 97(10), 1794-1802.
25. Kalichman S.C., Simbayi L.C., Cloete A., Clayford M., Arnolds W., Mxoli A., et al. (2009). Integrated gender-based violence and HIV Risk reduction intervention for South African men: results of a quasi-experimental field trial. *Prevention Sciences*, 10(3), 260-269.
26. Wechsberg, W.M., Zule, W.A., Luseno, W.K., Kline, T.L., Browne, F.A., Novak, S.P., et al. (2011). Effectiveness of an adapted evidence-based woman-focused intervention for sex workers and non-sex workers: the Women's Health CoOp in South Africa. *The Journal of Drug Issues*, 41(2), 233-252.



27. Wechsberg, W.M., Jewkes R., Novak S.P., Kline T., Myers B., Browne F.A., et al. (2013). A brief intervention for drug use, sexual risk behaviours and violence prevention with vulnerable women in South Africa: a randomised trial of the Women's Health CoOp. *BMJ Open*, 3(5), e002622.
28. Jones D.L., Peltzer K., Villar-Loubet O., Shikwane E., Cook R., Vamos S., et al. (2013). Reducing the risk of HIV infection during pregnancy among South African women: a randomized controlled trial. *AIDS Care*, 25(6), 702-709.
29. Kongsuwan V., Suttharangsee W., Isaramalai S., & Weiss S.J. (2012). The development and effectiveness of a violence prevention program for Thai high school students. *Pacific Rim International Journal of Nursing Research*, 16(3), 236-248.
30. Wongtongkam N., Ward P.R., Day A. Winefield, A.H. (2014). A trial of mindfulness meditation to reduce anger and violence in Thai youth. *International Journal of Mental Health and Addiction*, 12, 169-180.
31. Anliak S., & Sahin D. (2010). An observational study for evaluating the effects of interpersonal problem-solving skills training on behavioural dimensions. *Early Child Development and Care*, 180(8), 995-1003.
32. Akgun S., Araz A., Karadag S. (2007). We can resolve our conflicts: a conflict resolution education program and its psycho-social effects. *Turk Psikoloji Dergisi*, 22, 43-67.
33. Avcioglu H. (2012). The effectiveness of the instructional programs based on self-management strategies in acquisition of social skills by the children with intellectual disabilities. *Educational Sciences: Theory & Practice*, 12(1), 345-351.
